# Supplementary material for: Magnetic Co0.5Zn0.5Fe2O4nanoparticle-modified polymeric g-C3N4sheets with enhanced photocatalytic performance for chloromycetin degradation
Source: Royal Society of Chemistry journal article supplement (doi:10.1039/c6ra07915f), 2016-01-01
Supplement: c6ra07915f1.pdf [file c6ra07915f1.pdf]

## Supporting Information

### **Magnetical $\text{Co}_{0.5}\text{Zn}_{0.5}\text{Fe}_2\text{O}_4$ nanoparticles modified polymeric g- $\text{C}_3\text{N}_4$ sheets with enhanced photocatalysis performance for chloramphenicol degradation**

Wei Ma <sup>a,b</sup>, Long Chen <sup>b</sup>, Jiangdong Dai <sup>b</sup>, Chunxiang Li<sup>b,\*</sup>, Yongsheng Yan <sup>b,\*\*</sup>

<sup>a</sup> School of Chemistry and Chemical Engineering, Pingdingshan University, Pingdingshan 467099, China

<sup>b</sup> School of Chemistry and Chemical Engineering, Jiangsu University, Zhenjiang 212013, China

#### **Address correspondence to:**

Chunxiang Li<sup>b,\*</sup>, Yongsheng Yan <sup>b,\*\*</sup>

Department of Chemical Engineering

School of Chemistry and Chemical Engineering,

Jiangsu University, Zhenjiang 212013, P. R. China

Phone: 86-511-88789636

Fax: 86-511-88781119

E-mail: 253258398@qq.com

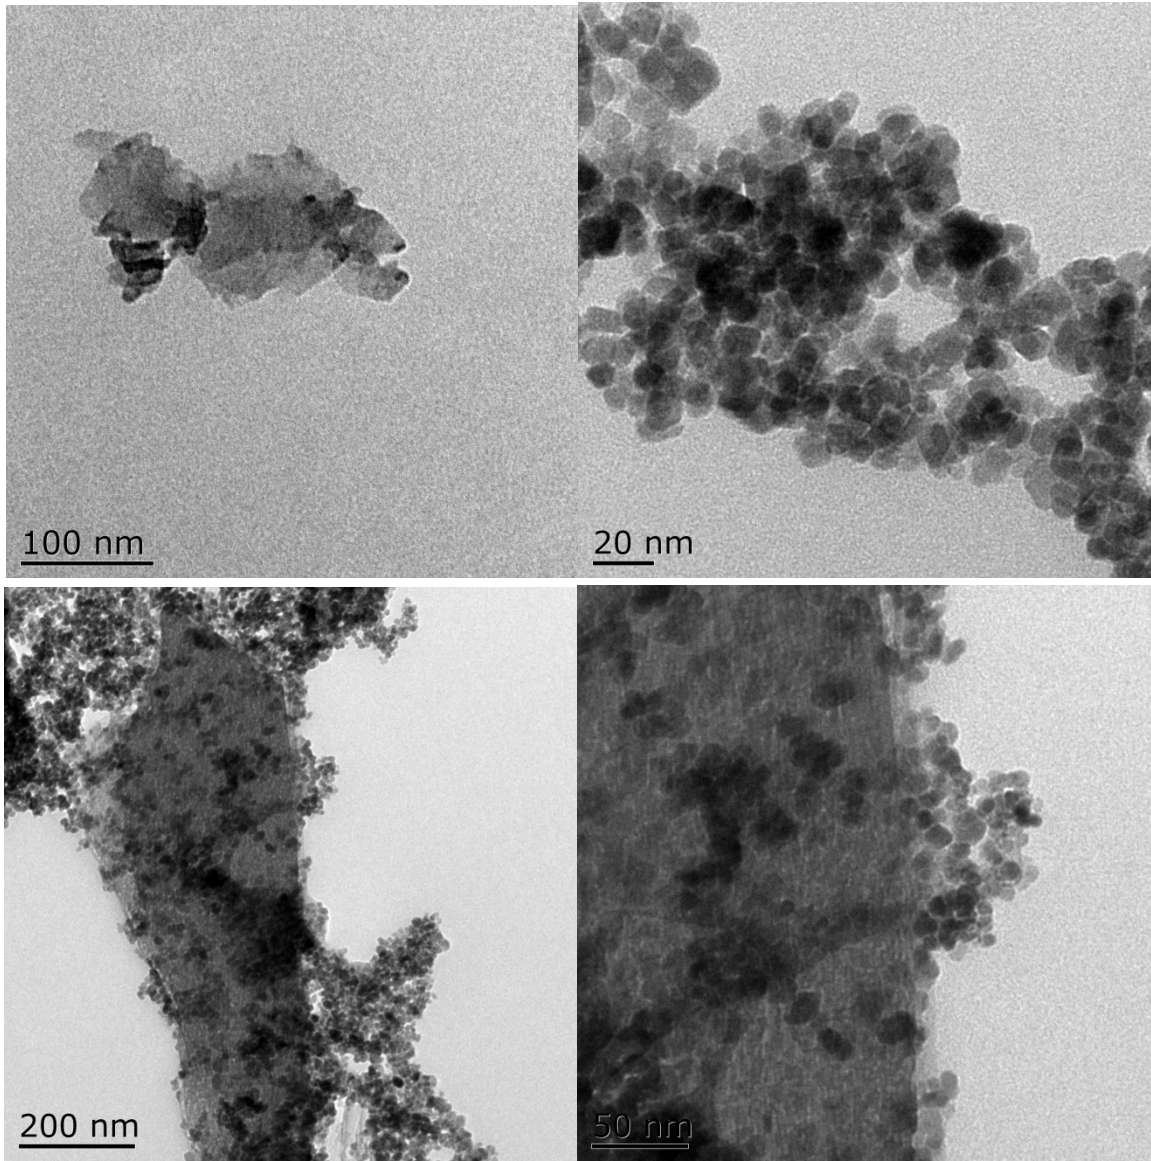

**Figure S1** the TEM of the  $g\text{-C}_3\text{N}_4, \text{Co}_{0.5}\text{Zn}_{0.5}\text{Fe}_2\text{O}_4$  NPs and CNCZF4

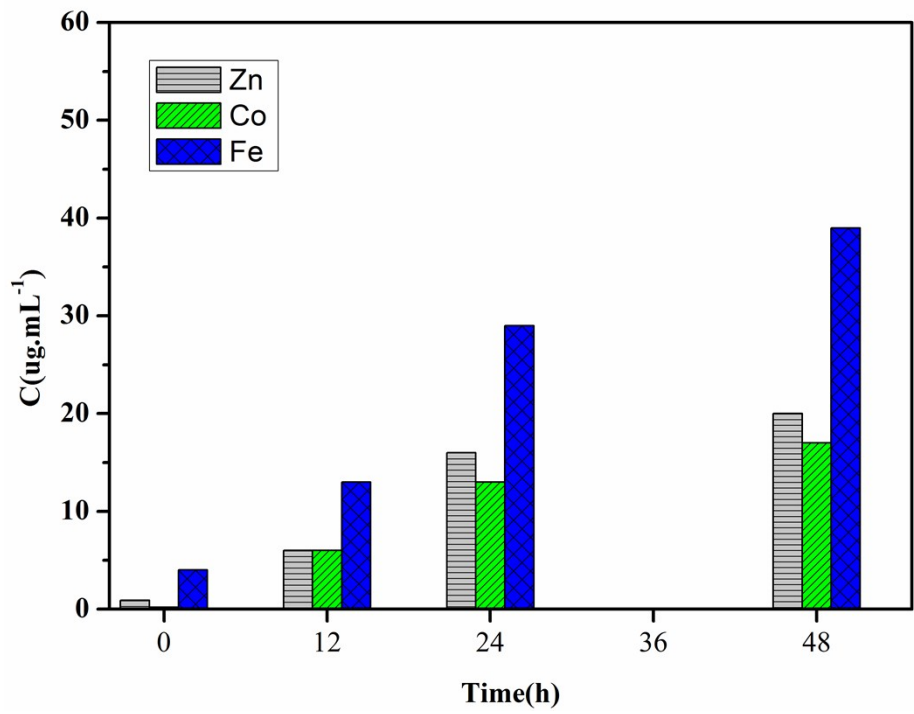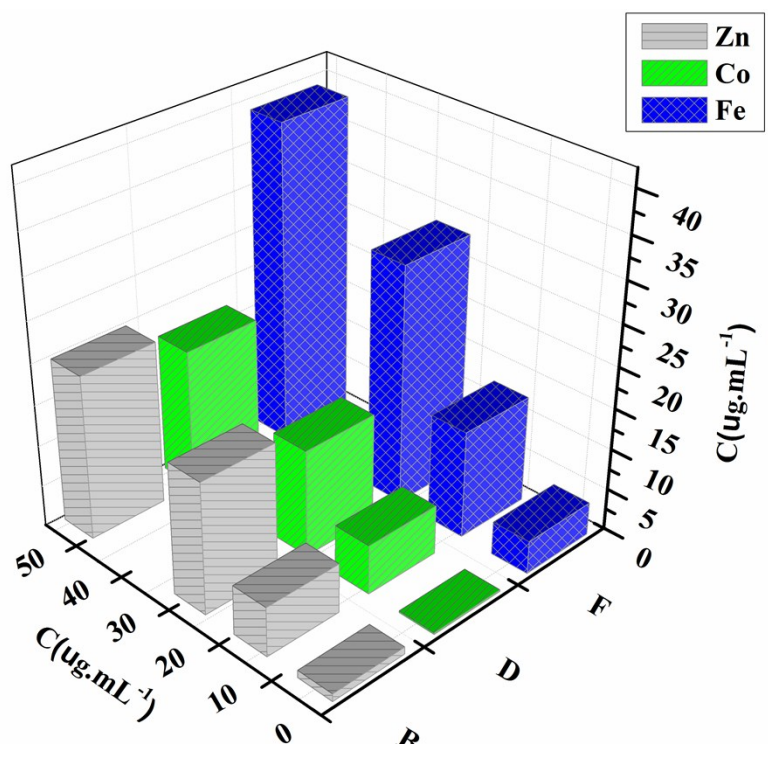

Figure S2 The concentration of the Co, Zn, Fe by ICP-OES analysis
